# Supplementary material
Source: Springer Nature journal article supplement (https://www.springermedizin.de/resource/supplementary/12936_2009_884_MOESM3_ESM.pdf/9548456)
Supplement: MOESM3 [file 9548456]

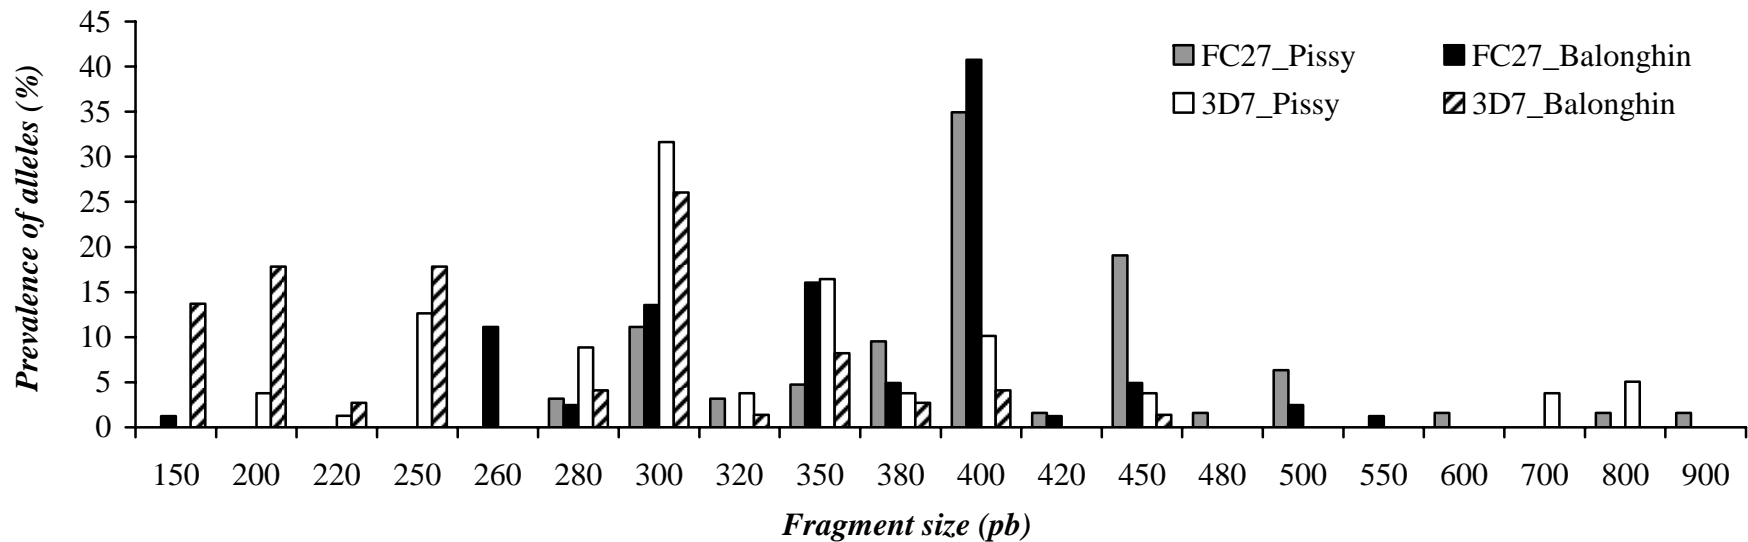

**Figure 2:** Prevalence of *P. falciparum* FC27 and 3D7 *msp2* alleles classified by length (in base pairs) in rural and urban area
